# Supplementary material for: Objectively measured sedentary behavior and moderate-to-vigorous physical activity on the health-related quality of life in US adults: The National Health and Nutrition Examination Survey 2003–2006
Source: Springer Nature journal article supplement (doi:10.1007/s11136-016-1451-y), 2016-11-11
Supplement: MOESM1 [file 11041228]

**Electronic Supplementary Material**

| **Table A1.** OR for poor HRQOL by sedentary behavior and moderate-to-vigorous physical activity at single- and multi-factor model | | | |
| --- | --- | --- | --- |
| Outcomes | Variables | Single-factor model**a** | Multi-factor modelb |
| General Health | *Sedentary behavior* |  |  |
| High (≥536 min/day) | 1.00 (Reference) | 1.00 (Reference) |
| Moderate (438-535 min/day) | 0.74 (0.59−0.93) | 0.78 (0.63−1.00) |
| Low (<438 min/day) | 0.66 (0.50−0.86) | 0.77 (0.58−1.03) |
| *P for trend* | 0.003 | 0.088 |
| *Moderate-to-vigorous physical activity* |  |  |
| Low (<51 min/week) | 1.00 (Reference) | 1.00 (Reference) |
| Moderate (51-165 min/week) | 0.70 (0.54−0.90) | 0.74 (0.58−0.94) |
| High (≥165 min/week) | 0.56 (0.43−0.74) | 0.61 (0.45−0.82) |
| *P for trend* | < 0.001 | 0.002 |
| Physical Health | *Sedentary behavior* |  |  |
| High (≥536 min/day) | 1.00 (Reference) | 1.00 (Reference) |
| Moderate (438-535 min/day) | 0.72 (0.57−0.92) | 0.80 (0.63−0.99) |
| Low (<438 min/day) | 0.69 (0.46−1.02) | 0.84 (0.55−1.29) |
| *P for trend* | 0.069 | 0.363 |
| *Moderate-to-vigorous physical activity* |  |  |
| Low (<51 min/week) | 1.00 (Reference) | 1.00 (Reference) |
| Moderate (51-165 min/week) | 0.58 (0.45−0.76) | 0.61 (0.46−0.80) |
| High (≥165 min/week) | 0.54 (0.38−0.76) | 0.57 (0.40−0.81) |
| *P for trend* | < 0.001 | 0.003 |
| Mental Health | *Sedentary behavior* |  |  |
| High (≥536 min/day) | 1.00 (Reference) | 1.00 (Reference) |
| Moderate (438-535 min/day) | 1.05 (0.74−1.47) | 1.07 (0.76−1.51) |
| Low (<438 min/day) | 0.93 (0.68−1.28) | 0.99 (0.71−1.40) |
| *P for trend* | 0.621 | 0.933 |
| *Moderate-to-vigorous physical activity* |  |  |
| Low (<51 min/week) | 1.00 (Reference) | 1.00 (Reference) |
| Moderate (51-165 min/week) | 0.90 (0.63−1.30) | 0.90 (0.61−1.32) |
| High (≥165 min/week) | 0.82 (0.53−1.25) | 0.82 (0.52−1.31) |
| *P for trend* | 0.352 | 0.398 |
| Activity limitation | *Sedentary behavior* |  |  |
| High (≥536 min/day) | 1.00 (Reference) | 1.00 (Reference) |
| Moderate (438-535 min/day) | 0.59 (0.39−0.87) | 0.65 (0.43−0.98) |
| Low (<438 min/day) | 0.39 (0.23−0.66) | 0.48 (0.27−0.87) |
| *P for trend* | < 0.001 | 0.007 |
| *Moderate-to-vigorous physical activity* |  |  |
| Low (<51 min/week) | 1.00 (Reference) | 1.00 (Reference) |
| Moderate (51-165 min/week) | 0.42 (0.27−0.66) | 0.50 (0.32−0.80) |
| High (≥165 min/week) | 0.51 (0.32−0.83) | 0.67 (0.39−1.15) |
| *P for trend* | 0.004 | 0.134 |
| *Note.* Values were odds ratio (95% CI).  a Single-factor model were adjusted for age, sex, race/ethnicity, accelerometer wear time, smoking status, alcohol consumption, education level, household income, living status, employment status, obesity and number of chronic disease.  b Multi-factor model defined in Table 2 (Model E) were used. Sedentary behavior model were further adjusted for moderate-vigorous physical activity, and moderate-to-vigorous physical activity model were further adjusted for sedentary behavior. | | | |

| **Table A2.** OR for poor HRQOL by light-intensity activity and MVPA at single- and multi-factor model | | | |
| --- | --- | --- | --- |
| Outcomes | Variables | Single-factor model**a** | Multi-factor modelb |
| General Health | *Light intensity activity* |  |  |
| Low (<228 min/week) | 1.00 (Reference) | 1.00 (Reference) |
| Moderate (228-284 min/week) | 0.83 (0.66−1.06) | 0.79 (0.60−1.05) |
| High (≥285 min/week) | 0.77 (0.58−1.02) | 0.86 (0.68−1.09) |
| *P for trend* | 0.135 | 0.207 |
| *Moderate-to-vigorous physical activity* |  |  |
| Low (< 51 min/week) | 1.00 (Reference) | 1.00 (Reference) |
| Moderate (51 - 165 min/week) | 0.70 (0.54−0.90) | 0.71 (0.55−0.91) |
| High (≥ 165 min/week) | 0.56 (0.43−0.74) | 0.57 (0.43−0.75) |
| *P for trend* | < 0.001 | < 0.001 |
| Physical Health | *Light intensity activity* |  |  |
| Low (<228 min/week) | 1.00 (Reference) | 1.00 (Reference) |
| Moderate (228-284 min/week) | 0.96 (0.72−1.28) | 1.01 (0.75−1.35) |
| High (≥285 min/week) | 0.80 (0.58−1.10) | 0.85 (0.58−1.10) |
| *P for trend* | 0.180 | 0.274 |
| *Moderate-to-vigorous physical activity* |  |  |
| Low (<51 min/week) | 1.00 (Reference) | 1.00 (Reference) |
| Moderate (51-165 min/week) | 0.58 (0.45−0.76) | 0.58 (0.45−0.76) |
| High (≥165 min/week) | 0.54 (0.38−0.76) | 0.54 (0.38−0.76) |
| *P for trend* | < 0.001 | < 0.001 |
| Mental Health | *Light intensity activity* |  |  |
| Low (<228 min/week) | 1.00 (Reference) | 1.00 (Reference) |
| Moderate (228-284 min/week) | 0.94 (0.73−1.21) | 0.95 (0.74−1.22) |
| High (≥285 min/week) | 0.84 (0.62−1.13) | 0.85 (0.63−1.14) |
| *P for trend* | 0.246 | 0.274 |
| *Moderate-to-vigorous physical activity* |  |  |
| Low (<51 min/week) | 1.00 (Reference) | 1.00 (Reference) |
| Moderate (51-165 min/week) | 0.90 (0.63−1.30) | 0.92 (0.64−1.32) |
| High (≥165 min/week) | 0.82 (0.53−1.25) | 0.83 (0.54−1.27) |
| *P for trend* | 0.352 | 0.376 |
| Activity limitation | *Light intensity activity* |  |  |
| Low (<228 min/week) | 1.00 (Reference) | 1.00 (Reference) |
| Moderate (228-284 min/week) | 0.63 (0.35−1.13) | 0.65 (0.45−0.95) |
| High (≥285 min/week) | 0.60 (0.42−0.86) | 0.71 (0.40−1.26) |
| *P for trend* | 0.078 | 0.127 |
| *Moderate-to-vigorous physical activity* |  |  |
| Low (<51 min/week) | 1.00 (Reference) | 1.00 (Reference) |
| Moderate (51-165 min/week) | 0.42 (0.27−0.66) | 0.42 (0.27−0.66) |
| High (≥165 min/week) | 0.51 (0.32−0.83) | 0.51 (0.32−0.83) |
| *P for trend* | 0.004 | 0.008 |
| *Note.* Values were odds ratio (95% CI).  a Single-factor model were adjusted for age, sex, race/ethnicity, accelerometer wear time, smoking status, alcohol consumption, education level, household income, living status, employment status, obesity and number of chronic disease.  b Multi-factor model defined in Table 2 (Model E) were used. Sedentary behavior model were further adjusted for moderate-to-vigorous physical activity, and moderate-to-vigorous physical activity model were further adjusted for sedentary behavior. | | | |


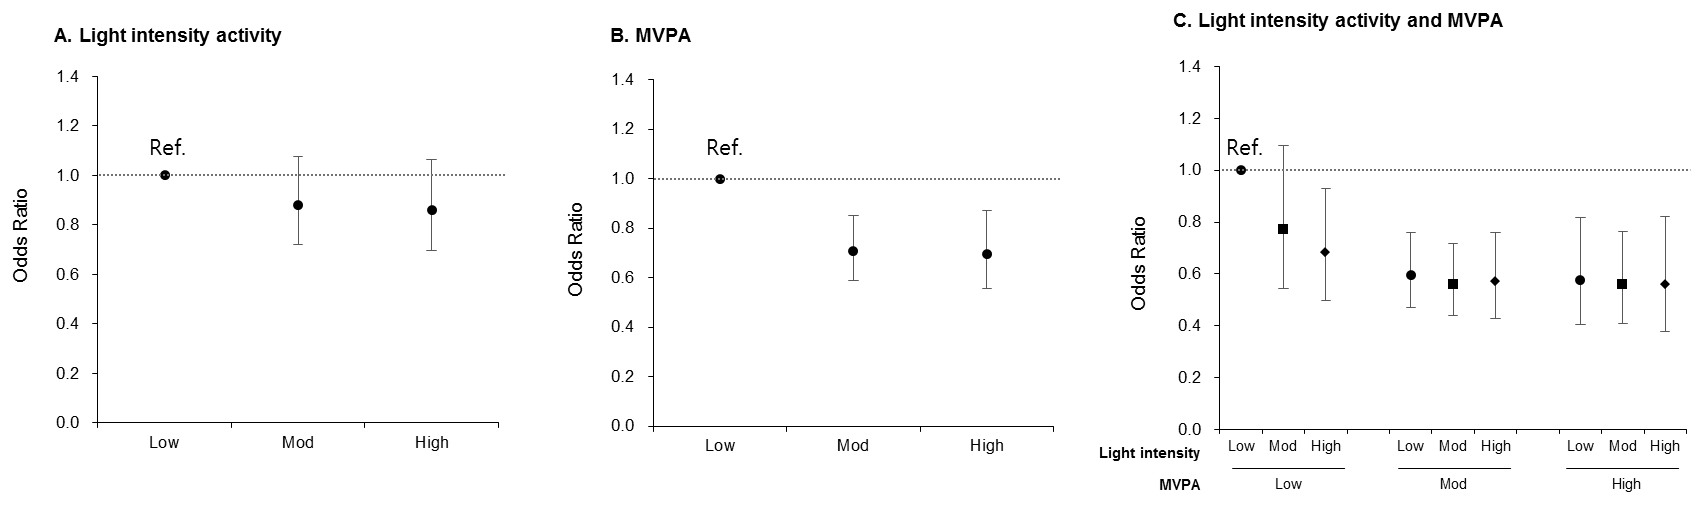


**Figure A1.** OR (95%CI) for poor overall HRQOL by combination of light-intensity activity and MVPA

*Note.* Adjusted for age, sex, race/ethnicity, accelerometer wear time, smoking status, alcohol consumption, education level, household income, living status, employment, obesity, and number of chronic diseases.

SB, *P* for trend=0.094; MVPA, *P* for trend=0.0019


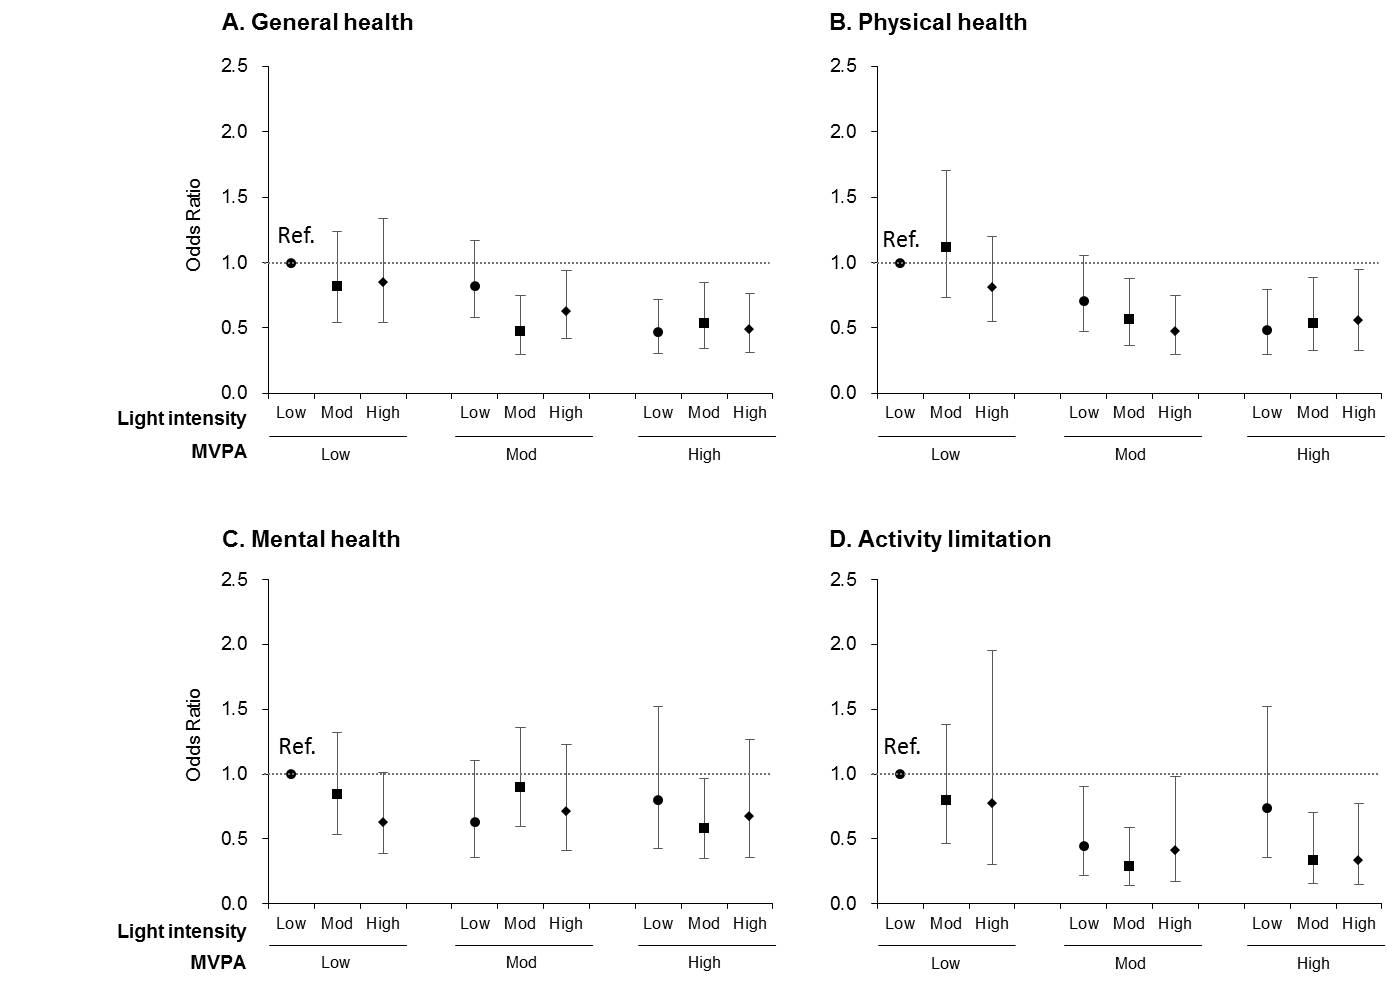


**Figure A2.** OR (95%CI) for poor HRQOL components by combination of light-intensity activity and MVPA

*Note.* Adjusted for age, sex, race/ethnicity, accelerometer wear time, smoking status, alcohol consumption, education level, household income, living status, employment, obesity, and number of chronic diseases.
